# EvoFreq: Visualization of the Evolutionary Frequencies of Sequence and Model Data

Chandler D. Gatenbee<sup>1,†</sup>, Ryan O. Schenck<sup>1,2,†</sup>, Rafael Bravo<sup>1</sup>, Alexander R.A. Anderson<sup>1,\*</sup>,

**1 Integrated Mathematical Oncology, Moffitt Cancer Center, Tampa, Florida, USA**

**2 Wellcome Centre for Human Genetics, University of Oxford, Oxford, UK**

† **These authors contributed equally to this work.**

\* **Corresponding Author: [Alexander.Anderson@moffitt.org](mailto:Alexander.Anderson@moffitt.org)**

## Abstract

High throughput sequence data has provided in depth means of molecular characterization of populations. When recorded at numerous time steps, such data can reveal the evolutionary dynamics of the population under study by tracking the changes in genotype frequencies over time. This necessitates a simple and flexible means of visualizing an increasingly complex set of data. Here we offer EvoFreq as a comprehensive tool set to visualize the evolutionary and population frequency dynamics of clones at a single point in time or as population frequencies over time using a variety of informative methods. EvoFreq expands substantially on previous means of visualizing the clonal, temporal dynamics and offers users a range of options for displaying their sequence or model data. EvoFreq, implemented in R with robust user options and few dependencies, offers a high-throughput means of quickly building, and interrogating the temporal dynamics of hereditary information across many systems. EvoFreq is freely available via <https://github.com/MathOnco/EvoFreq>.

## Background

Changes in genotype frequencies are often visualized using Muller plots, wherein each polygon represents a genotype (clone), and the thickness of the polygon indicates either the number of individuals with that genotype, or the frequency of the genotype in the total population at each time point. Nesting of genotypes represents evolutionary relationships, i.e. one genotype emerging from within another genotype's polygon indicates that the former was created by an individual with the latter genotype. Muller plots thus provide an excellent way to visualize how the genetic composition of a population changes over time. As these changes are governed by mutation, selection, drift, and gene flow (evolutionary forces), the visualization of these dynamics facilitates an understanding of which forces are dominating the population.

One example where this form of data visualization has proven insightful is in understanding tumor evolution and subclonal compositions from both mechanistic models and bulk or multi-region sequencing. The hereditary nature of mutations in somatic tissue and cancers allows us to recapitulate, the temporal dynamics associated with mutational events through subclonal reconstruction. To date, two visualization packages exist in R to visualize this temporal data `fishplot` [5] and `ggmuller` [7]. We constructed an alternative library that includes the features of these two libraries while expanding functionalities (see Table 1). EvoFreq offers users ease of implementation and a way to generate many visualizations for

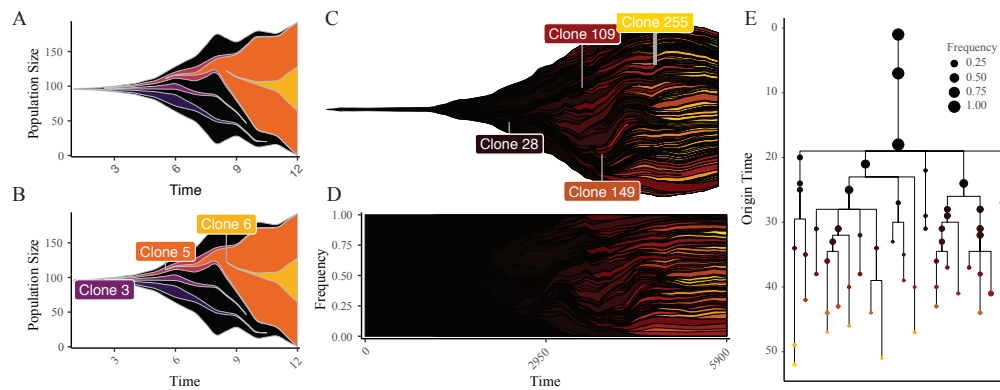

**Figure 1.** EvoFreq is a comprehensive and flexible R package for the visualization of longitudinal data. **A** and **B** show an EvoFreq plot for one of the provided datasets with **B** and without **A** the function to add labels. For more complicated data EvoFreq provides a powerful means to quickly filter data (**C** and **D** thresholded at 0.2 frequency), color by an attribute (driver strength), and visualize dynamics as a frequencies rather than population size. Using a dendrogram styled to ensure that origin time is easily conveyed (termed here as an EvoGram), a more quantitative view is provided **E**.

assessing the temporal dynamics of clonal Evolutionary Frequencies. EvoFreq is available at <https://github.com/MathOnco/EvoFreq>.

## Implementation and Results

EvoFreq is built on top of the leading visualization library in R, ggplot2 [13]. Input data can be either clone sizes or frequencies, and in long or wide formats. Given such data, EvoFreq can create Muller plots and/or dendrograms, revealing the clonal dynamics over time. Additional customizations include the ability to color clones based on a user defined attribute (such as fitness), provide custom colors, and label polygons. Due to EvoFreq's utilization of ggplot2 as the primary, underlying library, further customization to EvoFreq's plots is possible. Using the optional dependency [8], users may also create animations of evolving Muller plots and "growing" dendrograms.

EvoFreq is capable of visualizing frequency dynamics at a single point in time, as a phylogenetic tree representation, a graph representation, or as a frequency plot over time similar to FishPlot and ggMuller, but with extended capabilities.

At the core of EvoFreq is the ability to visualize relational data structures over time, whether this is from simulations or inferred from data. Here we illustrate the usefulness of generating these results using EvoFreq. Our first example utilizes data generated by West *et al.* which quantifies how spatial constraints alter the evolutionary trajectory of a single tumor using a passenger-driver model [10]. EvoFreq was used extensively within this publication and a subset of this data is shown in Figure 1. This figure highlights how the user can manually or automatically add labels to provide informative details of clones, a particularly useful feature of EvoFreq.

Second, we analyze sequence data using three different clonal reconstruction tools from 15 initial engraftments and serial propagation of primary and metastatic breast cancers [3] and visualize these results using EvoFreq. We applied ClonEvol [1], PhyloWGS [2], and CALDER [6] to infer the clonal dynamics from each of the longitudinal xenografts (select inferences are illustrated in Figure 2). Initial processing and reformatting of the somatic single nucleotide variant (SNV), copy-number alteration (CNA), and loss of heterozygosity (LOH) data from whole-genome shotgun sequences (WGSS) and Affymetrix SNP Array 6.0 was carried out to

|                                                    | ggmuller | fishplot | EvoFreq |
|----------------------------------------------------|----------|----------|---------|
| Frequency data                                     |          | ✓        | ✓       |
| Size data                                          | ✓        |          | ✓       |
| Long format                                        | ✓        |          | ✓       |
| Wide format                                        |          | ✓        | ✓       |
| Smoothing                                          |          | ✓        | ✓       |
| Uses ggplot                                        | ✓        |          | ✓       |
| Animations                                         |          |          | ✓       |
| Create graphs                                      |          |          | ✓       |
| Integration with subclonal reconstruction software |          | ✓        | ✓       |

**Table 1.** Comparison of the features within the currently available packages for plotting evolutionary dynamics. EvoFreq is capable of visualizing the evolutionary dynamics from ClonEvol, PhyloWGS, and CALDER.

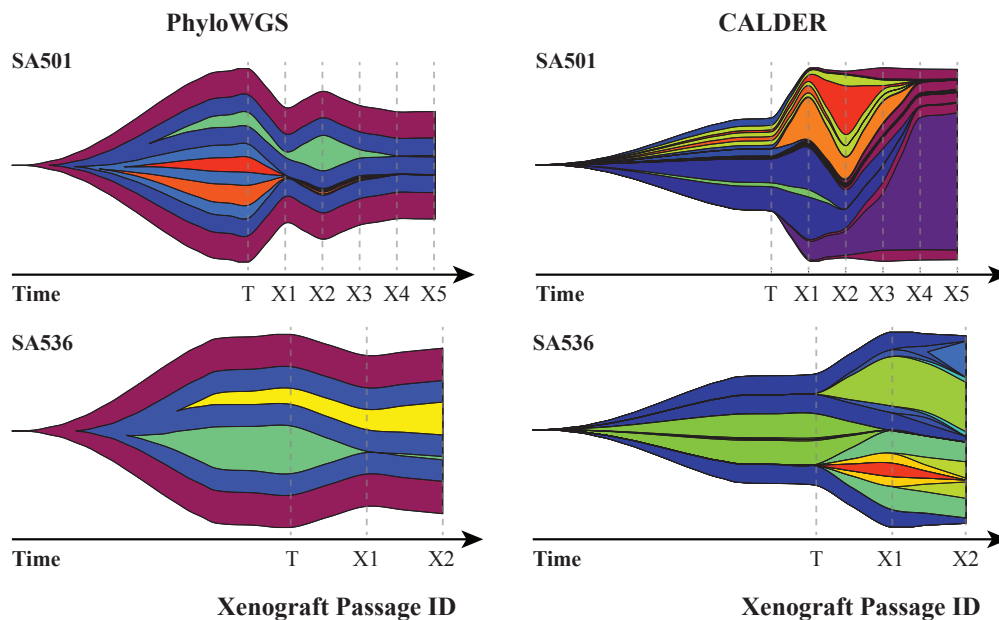

**Figure 2.** EvoFreq can be easily used to visualize outputs from CloneEvol, PhyloWGS, and CALDER. Data parsing functions are included within EvoFreq to rapidly visualize subclonal reconstructions. Each column above illustrates a method of subclonal reconstruction for two separate human breast cancer xenograftments from Eirew *et al.* [3] for PhyloWGS (left) and CALDER (right). Originating tumors (T) and their subsequent xenograft passages (X1, X2, etc.) are shown for SA501 (top) and SA536 (bottom).

extract read data using custom python scripts and prepare inputs for PhyloWGS and CALDER. Each of these tools requires different pre-processing and infers subclonal reconstructions in different ways. We have incorporated functions within EvoFreq to parse outputs of each of these tools to visualize inferred clonal dynamics using EvoFreq. When the output provides numerous solutions for subclonal reconstructions, the user has an option of returning one or all of these solutions. Examples of this process have also been provided within EvoFreq's documentation.

## Conclusions

We present EvoFreq as a versatile library capable of, generating publication and presentation ready images as well as video for, visualizing clonal frequencies over time. EvoFreq's design allows for broad access to all users through robust support for input data and input validation functions. EvoFreq can be used for all relational data structures providing many different visualizations from one user-facing library, making it applicable in a number of fields. EvoFreq has currently been adopted by a number of research groups, focused on cancer genomics and mechanistic modelling, and has been used in more than four studies already [4, 9, 11, 12]. All source code, read me, and issue support is available at <https://github.com/MathOnco/EvoFreq>.

## Availability and requirements

**Project name:** EvoFreq

**Project home page:** <https://github.com/MathOnco/EvoFreq>

**Operating system:** Operating system independent.

**Programming languages:** R

**Other requirements:** ggplot2.

**License:** GNU GPLv3

**Any restrictions to use by non-academics:** None

## Author's contributions

CDG and ROS wrote the code base and packaged EvoFreq for distribution and prepared the manuscript. RRB assisted in the development of algorithms needed for graphical representation of frequencies. ARAA provided guidance on code development, oversaw all work efforts and provided funding. All authors read, edited, and approved the manuscript.

## Funding

The authors gratefully acknowledge funding from both the Cancer Systems Biology Consortium (CSBC) and the Physical Sciences Oncology Network (PSON) at the National Cancer Institute, through grants U01CA232382 (supporting ARAA) and U54CA193489 (supporting CDG, ARAA). ARAA would also like to acknowledge support from the Moffitt Center of Excellence for Evolutionary Therapy. is supported by the Wellcome Trust (grant no. 108861/7/15/7) and the Wellcome Centre for Human Genetics (grant no. 203141/7/16/7).

## Availability of data and materials

Not applicable.



## Ethics approval and consent to participate

Not applicable.

## Consent for publication

Not applicable.

## Competing interests

The authors declare that they have no competing interests.

## References

1. H X Dang, B S White, S M Foltz, C A Miller, J Luo, R C Fields, and C A Maher. Clonevol: clonal ordering and visualization in cancer sequencing. *Annals of Oncology*, 28(12):3076–3082, 6/10/2019 2017.
2. Amit G. Deshwar, Shankar Vembu, Christina K. Yung, Gun Ho Jang, Lincoln Stein, and Quaid Morris. Phylowgs: Reconstructing subclonal composition and evolution from whole-genome sequencing of tumors. *Genome Biology*, 16(1):35, 2015.
3. Peter Eirew, Adi Steif, Jaswinder Khattra, Gavin Ha, Damian Yap, Hossein Farahani, Karen Gelmon, Stephen Chia, Colin Mar, Adrian Wan, Emma Laks, Justina Biele, Karey Shumansky, Jamie Rosner, Andrew McPherson, Cydney Nielsen, Andrew J. L. Roth, Calvin Lefebvre, Ali Bashashati, Camila de Souza, Celia Siu, Radhouane Aniba, Jazmine Brimhall, Arusha Oloumi, Tomo Osako, Alejandra Bruna, Jose L. Sandoval, Teresa Algara, Wendy Greenwood, Kaston Leung, Hongwei Cheng, Hui Xue, Yuzhuo Wang, Dong Lin, Andrew J. Mungall, Richard Moore, Yongjun Zhao, Julie Lorette, Long Nguyen, David Huntsman, Connie J. Eaves, Carl Hansen, Marco A. Marra, Carlos Caldas, Sohrab P. Shah, and Samuel Aparicio. Dynamics of genomic clones in breast cancer patient xenografts at single-cell resolution. *Nature*, 518:422 EP–, 11 2014.
4. Chandler D. Gatenbee, Ann-Marie Baker, Ryan O. Schenck, Margarida P. Neves, Sara Yakub Hasan, Pierre Martinez, William CH Cross, Marnix Jansen, Manuel Rodriguez-Justo, Andrea Sottoriva, Simon Leedham, Mark Robertson-Tessi, Trevor A. Graham, and Alexander R. A. Anderson. Niche engineering drives early passage through an immune bottleneck in progression to colorectal cancer. *bioRxiv*, page 623959, 01 2019.
5. Christopher A. Miller, Joshua McMichael, Ha X. Dang, Christopher A. Maher, Li Ding, Timothy J. Ley, Elaine R. Mardis, and Richard K. Wilson. Visualizing tumor evolution with the fishplot package for r. *BMC Genomics*, 17(1):880, 2016.
6. Matthew A. Myers, Gryte Satas, and Benjamin J. Raphael. Inferring tumor evolution from longitudinal samples. *bioRxiv*, 2019.
7. Robert Noble. *ggmuller: Create Muller Plots of Evolutionary Dynamics*, 2018. R package version 0.5.1.
8. Thomas Lin Pedersen and David Robinson. *gganimate: A Grammar of Animated Graphics*, 2019. R package version 1.0.3.9000.

9. Ryan O. Schenck, Eunjung Kim, Rafael R. Bravo, Jeffrey West, Simon Leedham, Darryl Shibata, and Alexander R. A. Anderson. How homeostasis limits keratinocyte evolution. *bioRxiv*, page 548131, 01 2019.
10. Jeffrey West, Ryan Schenck, Chandler Gatenbee, Mark Robertson-Tessi, and Alexander RA Anderson. Tissue structure accelerates evolution: premalignant sweeps precede neutral expansion. *bioRxiv*, page 542019, 01 2019.
11. Jeffrey West, Ryan O. Schenck, Chandler Gatenbee, Mark Robertson-Tessi, and Alexander R. A. Anderson. Tissue structure accelerates evolution: premalignant sweeps precede neutral expansion. *bioRxiv*, page 542019, 01 2019.
12. Jeffrey West, Li You, Jingsong Zhang, Robert A. Gatenby, Joel Brown, Paul K. Newton, and Alexander R. A. Anderson. Towards multi-drug adaptive therapy. *bioRxiv*, page 476507, 01 2019.
13. Hadley Wickham. *ggplot2: Elegant Graphics for Data Analysis*. Springer-Verlag New York, 2016.
